# Supplementary material
Source: Springer Nature journal article supplement (https://www.springermedizin.de/resource/supplementary/12931_2013_1447_MOESM6_ESM.pdf/9426018)

● Si-scr PBS ▲ Si-ERp57+ATF6 PBS  
 □ Si-scr HDM ▽ Si-ERp57+ATF6 HDM

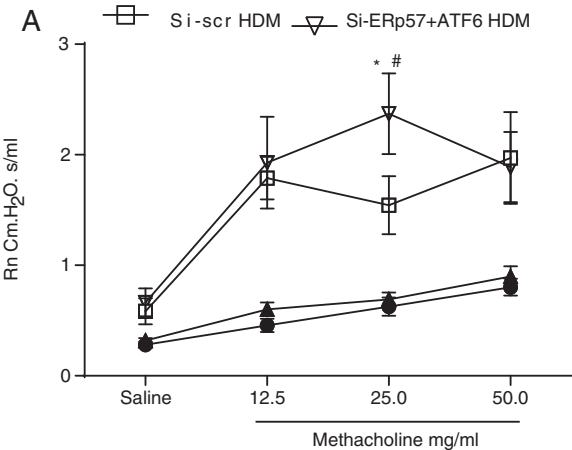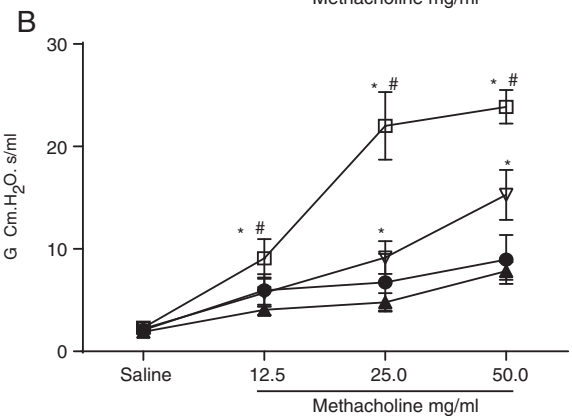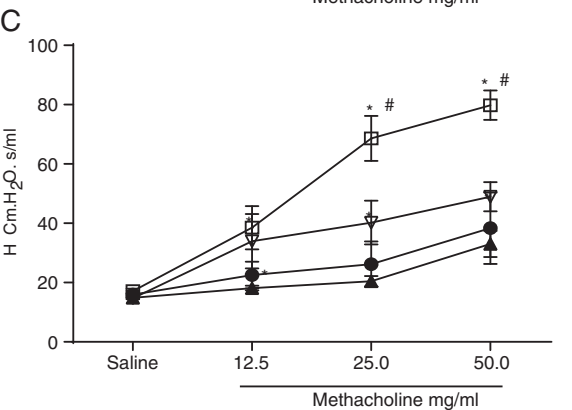

Supplement: MOESM6 [file 9426018]
